# Supplementary material for: Photophysics and electroluminescence of red quantum dots diluted in a thermally activated delayed fluorescence host
Source: Royal Society of Chemistry journal article supplement (doi:10.1039/c9tc04340c), 2019-01-01
Supplement: c9tc04340c1.pdf [file c9tc04340c1.pdf]

## Electronic Supplementary Information

### Photophysics and Electroluminescence of Red Quantum Dots Diluted in a Thermally Activated Delayed Fluorescence Host

*Yepeng Xiang,<sup>a,b</sup> Guohua Xie,<sup>\*a</sup> Manli Huang,<sup>a</sup> Chuluo Yang<sup>\*a,b</sup>*

Y. Xiang, Prof. G. Xie, M. Huang and Prof. C. Yang

<sup>a</sup> Renmin Hospital of Wuhan University, Department of Chemistry, Hubei Key Lab on Organic and Polymeric Optoelectronic Materials, Wuhan University, Wuhan 430072, People's Republic of China

E-mail: guohua.xie@whu.edu.cn, clyang@whu.edu.cn

Y. Xiang and Prof. C. Yang

<sup>b</sup> Shenzhen Key Laboratory of Polymer Science and Technology, College of Materials Science and Engineering, Shenzhen University, Shenzhen 518060, China

#### General information

**Materials** All materials were used as received without further purification. Red CdSe/ZnS QDs (core/shell-type) octane solution was purchased from Mesolight. The poly(4-styrenesulfonic acid) (PSSA) solution (18 wt.% in H<sub>2</sub>O, d = 1.11 g/mL at 25 °C, Mw ~75,000 g/mol) was purchased from Sigma-Aldrich (CAS: 28210-41-5). The PEDOT:PSS (Heraeus Clevious P VP AI 4083) solution, host material of 1,3-bis(carbazol-9-yl)benzene (mCP) and electron injecting material lithium 8-hydroxyquinolinolate (Liq) were purchased from Xi'an Polymer Light Technology

Corporation. The m-PEDOT:PSS solution was simply prepared by mixing 11.1 ul PSSA solution per 100 ul pristine PEDOT:PSS (Heraeus Clevios P VP AI 4083) solution. The electron transport material of 1,3,5-*tri*(m-pyrid-3-yl-phenyl)benzene (TmPyPB) were purchased from Luminescence Technology Corporation. The TADF dendrimer host materials of 10,10'-(Sulfonylbis(4,1-phenylene))*bis*(2,7-*bis*(3,6-di-*tert*-butyl-9*H*-carbazol-9-yl)-9,9-dimethyl-9,10-dihydroacridine) (4CzDMAC-DPS) were synthesized by ourselves according to previous work and purified by recrystallization.<sup>25-26</sup>

**Device Fabrication** The ITO coated substrates were firstly cleaned with acetone and ethanol in an ultrasonic bath, respectively. The substrates were further dried with N<sub>2</sub> flow. After 20 min ultraviolet light-ozone (UVO) treatment in a UV-ozone surface processor PL16 series (Sen Lights Corporation), PEDOT:PSS or poly(4-styrenesulfonic acid) (PSSA) modified PEDOT:PSS (m-PEDOT:PSS) precursor was spin-coated onto the ITO surface at 4000 rpm. Afterwards, the substrate was transferred into a N<sub>2</sub> filled glovebox and then baked at 120 °C for 10 min. Subsequently, the corresponding emitting layer was spin-coated at 1000 rpm, followed with a baking at 100 °C for the pure QD layer or 50 °C for the doped QD layer. The electron transporting layer (TmPyPB), the electron injecting layer (Liq), and aluminum cathode were consecutively evaporated in a vacuum chamber under 10<sup>-5</sup> mbar. The as-fabricated device was sealed with curable UV resin and then measured in ambient air.

**Measurement** Current density-voltage characteristics, luminance and the EL spectra were recorded with a Keithley 2400 source meter unit and a Photoresearch SpectraScan PR735 spectrometer. The EQE was calculated from the current density, luminance and EL spectrum, assuming a Lambertian distribution. The transient photoluminescence (PL) spectra were measured

by a single photon counting spectrometer from Edinburgh Instruments (FLS920) with a Picosecond Pulsed UV-LASTER (LASTER377) as the excitation source. The absolute photoluminescence quantum yields (PLQYs) were obtained using a Quantaaurus-QY measurement system (C9920-02, Hamamatsu Photonics) and all the samples were excited at 365 nm. UV-Vis absorption spectra were recorded on a Shimadzu UV-2501 recording spectrophotometer with baseline correction. The steady-state photoluminescence spectra were recorded on a Hitachi F-4600 fluorescence spectrophotometer. Atomic force microscopy (AFM) measurements were carried out using a Digita Instrumental DI Multimode Nanoscope IIIa in tapping mode. Scanning electron microscopy (SEM) measurements were carried out using a Zeiss SIGMA.

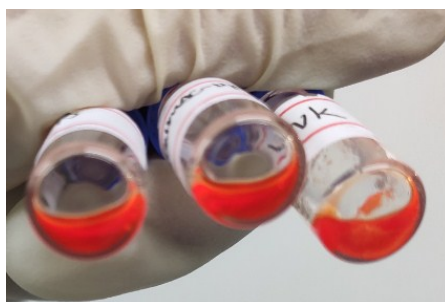

**Figure S1.** The image of the mCP:25 wt.% QD (left), 4CzDMAC-DPS: 25 wt.% QD (middle) and PVK: 25 wt.% QD (right) solutions.

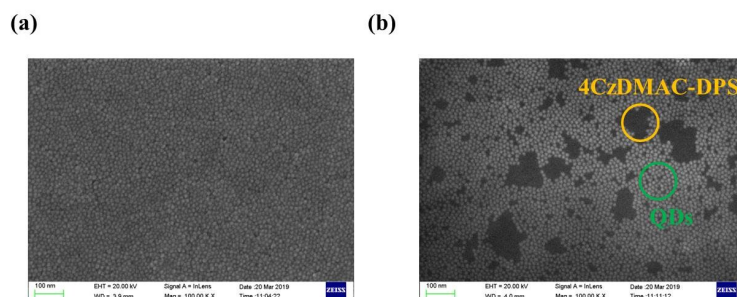

**Figure S2.** SEM topographic images of (a) pure QD and (b) 4CzDMAC-DPS: 25 wt.% QD films.

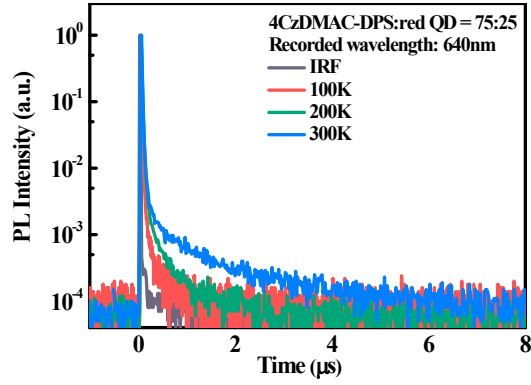

**Figure S3.** The transient photoluminescence decay spectra of red QD doped into 4CzDMAC-DPS films (25 wt.%) at various temperatures (recorded at 640 nm).

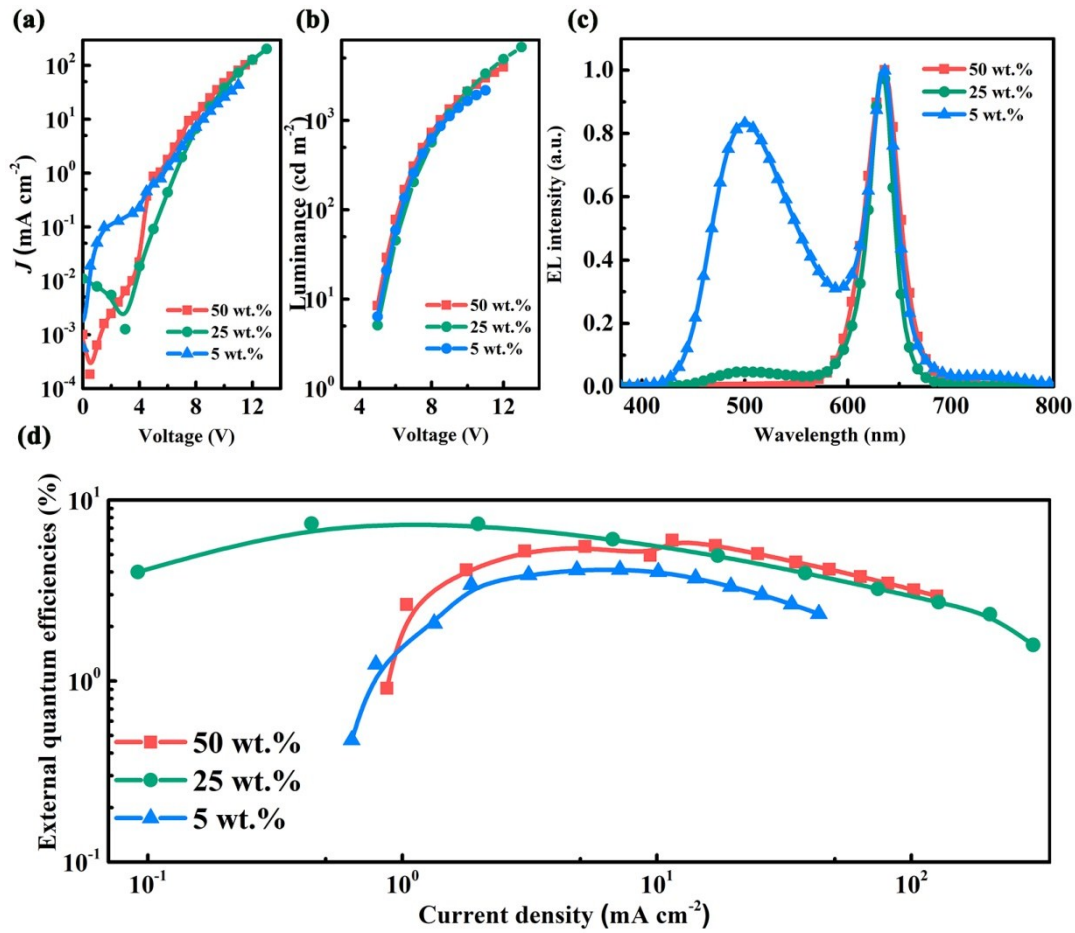

**Figure S4.** (a) Current density-voltage and (b) luminance-voltage curves of the 4CzDMAC-DPS:QD (X wt.%, X= 5, 25 and 50) based devices. (c) Normalized EL spectra of the devices at a driving voltage of 10 V. (d) External quantum efficiency (EQE) *versus* current density curves of the different QD doping concentration devices.

**Table S1.** The summary of EL characteristics for devices based on emitting layers with different doping concentrations of red QD in 4CzDMAC-DPS host.

| Doping concentration <sup>a</sup> [wt.%] | 50  | 25  | 5   |
|------------------------------------------|-----|-----|-----|
| EQE [%]                                  | 6.0 | 7.4 | 4.1 |

<sup>a</sup>The structure of device is ITO/PEDOT:PSS (Heraeus Clevious P VP Al 4083) (~35 nm)/host: QD (X wt.%, X= 5, 25 and 50) (50 nm)/TmPyPB (60 nm)/Liq (1 nm)/Al

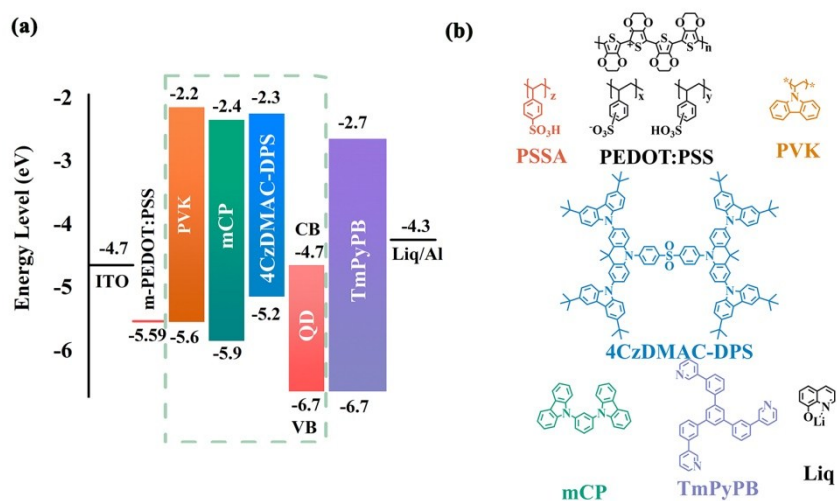

**Figure S5.** (a) The energy level diagrams and (b) chemical structures of the materials used for the devices 5-8.

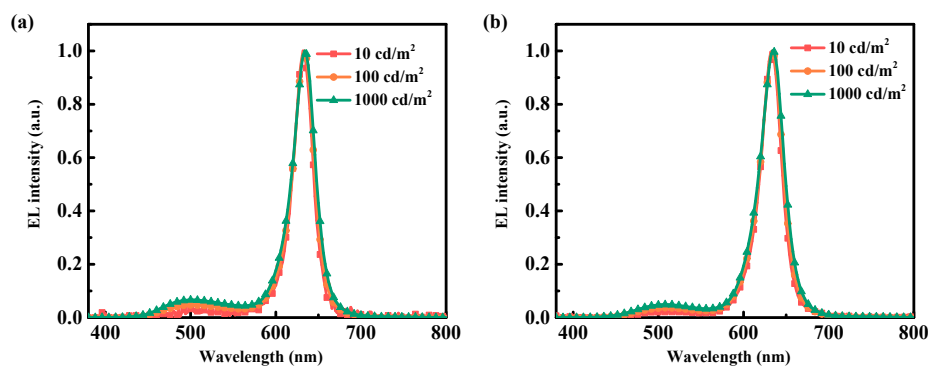

**Figure S6.** The normalized EL spectra of the 4CzDMAC-DPS involved devices (4 and 8) at various luminances.
